# Supplementary material
Source: publisher figshare collection journal article supplement (https://sage.figshare.com/ndownloader/files/19793309)
Supplement: Supplementary file [file 19793309]

Reviewer 1 v.1

Comments to the Author

The background ( and the title) of the manuscript suggest that it could be a relationship between satisfaction and adherence in COPD patients and this could be the aim of the study, but after that there is no question or any hypothesis, therefore statistical analysis must not use lineal regression which apply only for inferential studies. I suggest to modify the methodology or design in order to have clear and valid results. I am attaching another study<sup>1</sup> looking at adherence in COPD patients using the same questionnaire, which could be useful.

1. Montes de Oca M, Menezes A, Wehrmeister FC, Lopez Varela MV, Casas A, Ugalde L, et al. (2017) Adherence to inhaled therapies of COPD patients from seven Latin American countries: The LASSYC study. *PLoS ONE* 12(11): e0186777.  
<https://doi.org/10.1371/journal.pone.0186777>
